# Existence and construction of large stable food webs

Jan O. Haerter<sup>1,\*</sup>, Namiko Mitarai<sup>1</sup>, and Kim Sneppen<sup>1</sup>

<sup>1</sup>Center for Models of Life, Niels Bohr Institute, University of Copenhagen, Blegdamsvej 17, 2100  
Copenhagen, Denmark

**Correspondence:** Jan O. Haerter, Center for Models of Life, Niels Bohr Institute, University of Copenhagen, Blegdamsvej 17,  
2100 Copenhagen, Denmark, Tel: +34 604 256 282, Fax: +45 353 25425, [haerter@nbi.dk](mailto:haerter@nbi.dk)

**Statement of authorship:** All authors developed the theory, performed the data analysis and wrote the manuscript and appendix.

**Conflict of interest:** The authors have no conflicting interests to declare.

**Keywords:** Food web, coexistence, biodiversity, competitive exclusion principle, feasibility, stability.

## Abstract

Ecological diversity is ubiquitous despite the restrictions imposed by competitive exclusion and apparent competition. To explain the observed richness of species in a given habitat, food web theory has explored nonlinear functional responses, self-interaction or spatial structure and dispersal — model ingredients that have proven to promote stability and diversity. We here instead return to classical Lotka-Volterra equations, where species-species interaction is characterized by a simple product and spatial restrictions are ignored. We quantify how this idealization imposes constraints on coexistence and diversity for many species. To this end, we introduce the concept of *free* and *controlled* species and use this to demonstrate how stable food webs can be constructed by sequential addition of species. When we augment the resulting network by additional weak interactions we are able to show that it is possible to construct large food webs of arbitrary connectivity. Our model thus serves as a formal starting point for the study of sustainable interaction patterns between species.

## Introduction

When interactions between species are random, stability of large complex ecosystems has been suggested to be compromised [1]. On the other hand, when all interactions are absent, populations grow exponentially and diversity is suppressed since the winner will “take all”, i.e. the most-competitive species will take over all available resources. These considerations imply that

26 neither the presence of random interaction nor its complete absence can explain the observed diversity and apparent stability. It  
27 may thus be non-random competition between species that is needed to explain the diversity of the living world.

28 One step towards better understanding of how interactions can stabilize ecosystems comes from the web formed by phage  
29 and bacteria species in the ocean, where the dominance of the fastest growing bacteria species is reduced by phage predation  
30 [2]. Using oceanic data [3, 4] we recently demonstrated that the species richness of bacteria is strongly correlated with similarly  
31 high species richness of their phages, a feature we described as a "staircase of coexistence" [5]. This phenomenon of mutual  
32 support of diversity reflects a generalized version of competitive exclusion [6]. Notably, the resulting ecosystem has non-random  
33 interaction strengths, a manifestation of the principle of trade-offs [7, 8, 9].

34 As mentioned above, R. May [1] called into question whether well-connected food webs could be dynamically stable — using  
35 the assumption of random interactions. For observed food webs, however, it has by now repeatedly been stated that interactions  
36 between species populations are far from random [10, 11, 12, 13, 14, 15]. A body of experimental [16, 17, 18] and theoretical  
37 work [19, 20] suggests, that the interaction-strength distribution may be strongly skewed, with only few strong, but many weak  
38 interactions. It was further emphasized that the patterning of links might play an important role in stability [10], contradicting  
39 the null model of purely random interactions. The stabilizing role of non-randomness is further corroborated by analysis of  
40 loops [11]. Neutel and collaborators found that real food webs are structured such that long loops contain more weak links than  
41 expected at random, thereby promoting stabilization. Realizing that even May's random matrices implicitly make assumptions  
42 on the frequency of interaction types, recent work on dynamic stability stresses that more realistic relations between parameter  
43 values should be incorporated [14, 15, 21]. Their conclusions are surprising, in that they associate realistic link structures with  
44 lower stability than their unstructured counterpart, a finding yet to be reconciled with earlier studies [22, 23].

45 When exploring the stability of a specific fixed point for a given food web, the existence of this fixed point is implicitly  
46 assumed. However, the available theoretical criteria for dynamical stability so far remain difficult to reconcile with feasibility  
47 [21], defined as the demand that all species have positive populations. In the present work, we depart from the quest for random  
48 interactions and instead explore possible patterns of interactions that allow for large food webs under the strict constraints on  
49 both feasibility and stability.

50 Here we return to the classical Lotka-Volterra equations, where interactions between consumers and resources are modeled  
51 by the linear type-I response, i.e. the rate of consumption is proportional to the product of concentrations of the consumer and  
52 its resource. We first review the food web assembly rules, which describe how such equations yield a linear set of equations  
53 for the steady-state solutions of species concentrations and how such linearity constrains possible link structures in multi-level  
54 food webs (Methods). This leads us to introduce the concept of *free* and *controlled* species. For the subset of network structures  
55 compatible with the assembly rules we then describe how these could be built-up systematically, starting from a single resource  
56 and demanding feasibility and global stability at every addition of species. We further demonstrate how sizable communities  
57 of dozens of species can be obtained by this methodology and discuss the role of consumption efficiency, i.e. the rate of using  
58 resource biomass for growth. We finally compare species richness in our constructed communities to that of field data and close  
59 with a discussion of the implications of our work.

## 60 Methods

### 61 Generalized Lotka-Volterra equations

62 In the web formed by the interactions between consumers and resources in a habitat, energy flows from a physical or chemical  
 63 nutrient source up the food chain. The resulting structure is a food web which ties together the resources, their consumers and  
 64 subsequent consumers. Consider first a food web of  $L$  trophic levels (Fig. 1a) where each species can be assigned a sharp trophic  
 65 level  $l$ , i.e. any species exclusively consumes other species at a specific level. Such webs have recently been termed *maxi-*  
 66 *mally trophically coherent* [21]. Using Lotka-Volterra-type formalism, with the implicit assumptions of a well-mixed ecosystem  
 67 governed by mass action kinetics, the energy flux passing through a species  $S_i^{(l)}$  at level  $l$  is [24, 25]

$$\frac{\dot{S}_i^{(l)}}{S_i^{(l)}} = w_i^{(l)}. \quad (1)$$

68 Here and throughout the text use the symbol  $S$  as a general label for a given species, while  $S$  and  $Q$  refer to its time-dependent  
 69 and steady-state concentrations, respectively. When formulating the RHS of Eq. 1 in units of the carrying capacity for primary  
 70 producers ( $l=1$ ), the flux

$$w_i^{(1)} \equiv k_i^{(1)} \left( 1 - \sum_{j=1}^{n_1} p_{ji} S_j^{(1)} \right) - \alpha_i^{(1)} - \sum_{k=1}^{n_2} \eta_{ki}^{(2,1)} S_k^{(2)}$$

71 incorporates logistic growth at the basal level whereas

$$w_k^{(l)} = \sum_{m=1}^{n_{l-1}} \beta_{km}^{l,l-1} \cdot \eta_{km}^{l,l-1} \cdot S_m^{(l-1)} - \sum_{p=1}^{n_{l+1}} \eta_{pk}^{l+1,l} \cdot S_p^{(l+1)} - \alpha_k^{(l)}$$

72 accounts for biomass conversion at higher levels  $l > 1$ . Here,  $S_i^{(l)}$  is the biomass concentration of species  $S_i^{(l)}$ , superscripts  
 73 (subscripts) label the trophic level (species within a trophic level),  $k_i^{(1)}$  are maximal growth rates of basal species and  $p_{ji}$  are the  
 74 basal nutrient depletion strengths, which we subsequently will set equal to unity.

75 In the above equations we use the rate  $\alpha_i^{(l)}$  as the species-specific decay coefficients of species  $i$  at trophic level  $l$ , whereas  
 76  $\beta_{km}^{l,l-1}$  is the link-specific consumption efficiency of a species  $k$  at level  $l$  when consuming the species  $m$  at level  $l - 1$ , and  
 77  $\eta_{km}^{l,l-1}$  are the corresponding link-specific interaction strengths. For species at the top level  $L$ , the loss term in  $w_k^{(L)}$  will only  
 78 contain the intrinsic decay rate  $\alpha_k^{(L)}$  representing death by aging, accidents, or disease. For later use, independent of their trophic  
 79 level, we call species without consumers *top species*.

### 80 Assembly rules

81 In steady state,  $w_i^{(l)} = 0$  and Eq. 1 is a set of linear equations. A necessary condition for a unique steady-state solution is nonzero  
 82 determinant of the interaction matrix, which leads to the recent food web assembly rules [26]. Uniqueness in turn is required for  
 83 structural stability of the solutions. The assembly rules break the food web down into *pairings* of species. A pairing consists of  
 84 a consumer and one of its resources, hence the two species of each pairing are connected by an existing feeding link (Fig. 1a,b).

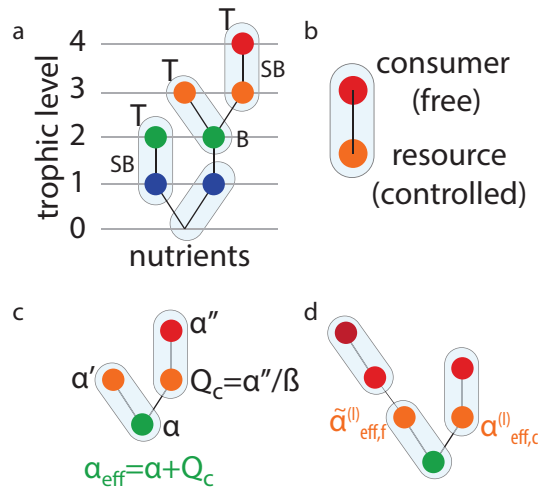

**Figure 1: Definitions.** **a**, Simple food web consisting of four trophic levels. We define the nutrient source to be trophic level zero. The trophic level of any species is the average trophic level of its resources plus one. Colored circles mark species, light blue ovals mark pairings of species, symbol (T) marks top species, i.e. species without consumers. Side branches are marked by the symbol “SB”. A branching species (or branching point) is marked by “B”.  $Q_c = \alpha''/\beta$  **b**, An example of a pairing, consisting of a “free” consumer and a “controlled” resource species. **c**, Definition of  $\alpha_{\text{eff}}$  for a controlled species:  $\alpha_{\text{eff}}$  equals the sum of the decay coefficient of the species itself and the steady-state density of its controlled consumer(s). **d**, Illustration of the condition (Eq. 10) for feasibility at branching points, showing the comparison between  $\tilde{\alpha}_{\text{eff},f}^{(l)}$  and  $\alpha_{\text{eff},c}^{(l)}$  for two branches formed by a free, respectively controlled, species.

85 The existence of a steady state in a maximally trophically coherent food web strictly requires that the food web can be covered  
 86 by such pairs and none of these pairs overlap [26]. This is known as *perfect matching* in graph theory [27]. Physical or chemical  
 87 nutrients can, but need not, be part of such pairings.

88 The pairing is convenient as it guarantees that no group of two or more species share exactly the same niche, i.e. a particular  
 89 set of interactions. The resulting rules can be seen as a generalization of the competitive exclusion principle, which states that  
 90 when two consumers compete for the exact same resource within an environment, one consumer will eventually out-compete  
 91 and displace the other [6, 28, 29]. Considering the different nutrient sources, e.g. sunlight or chemical substances, as residing at  
 92 trophic level zero (Fig. 1a), the assembly rules [26] can be stated compactly:

93 *The number of species at any trophic level  $l$  must not be less than the number of free species at the level  $l + 1$ .*

## 94 Results

95 In the following we introduce the conceptual classification of species into free and controlled species. Using these concepts,  
 96 we then provide conditions for sustainable additions of species, i.e. conditions that allow both the resident and “invading”  
 97 species to coexist without any species becoming extinct. These conditions relate the intrinsic fitness of an “invader” to that of  
 98 a specific subset of species providing for the invader’s nutrient uptake. We find that the division into “free” and “controlled”  
 99 species is natural in defining such conditions. Originating from this methodology, we then discuss how sizable food webs can be

100 constructed. Finally, we compare the species richness in our synthetic food webs to that observed in the field.

## 101 Free and Controlled Species

102 For the subsequent discussion, we define a class division of species into either the "free" or the "controlled" categories. Free  
 103 species are either top species, or species which are exclusively predated upon by controlled species. In contrast, a controlled  
 104 species is one that is regulated by (exactly one) free consumer. Note that the case of two free consumers is ruled out by competitive  
 105 exclusion. Besides this free consumer, a controlled species may be preyed upon by any number of controlled consumers. The  
 106 motivation for this division into "free" and "controlled" is a basic consequence of type-1 interactions, namely that a free predator  
 107 sets the population size of its prey, irrespective of the prey's reproduction rate. For simple linear food chains or for hierarchical  
 108 food webs each species is uniquely determined to be either free or controlled, reflecting the uniqueness of non-overlapping  
 109 pairing [26] in such networks.

## 110 Species addition

111 Consider now the process of adding new species to an existing food web. Following the addition of a few individuals of the new  
 112 species, Eq. 1 describe the subsequent dynamics of species populations towards a new steady state "equilibrium" value. We will  
 113 now explore conditions for stability and feasibility of the steady state for the thereby obtained new food web. Throughout, we will  
 114 assume a separation of the fast timescale of dynamical adjustment of all species concentrations to an equilibrium value and a slow  
 115 timescale of the introduction of any new species. We restrict additions to occur on a one-by-one basis. For simplicity, we will  
 116 refer to newly added species as invaders, but note that they might more properly be referred to as "additions" or "introductions",  
 117 since their properties will be chosen as to allow for coexistence of the resulting food web.

118 **Conditions for stability** —A sufficient criterion for dynamical stability is the existence of a Lyapunov function [24, 30]. Assume  
 119 first that positive, i.e. feasible, steady-state biomass concentrations  $Q_i^{(l)}$  exist for all species.  $Q_i^{(l)}$  is then obtained from setting  
 120  $w_i^{(l)} = 0$  in Eq. 1. In analogy to Goh [30], we define the function

$$V(S) \equiv \sum_{l=1}^N \sum_i c_i^{(l)} \left( S_i^{(l)} - Q_i^{(l)} \ln S_i^{(l)} \right) \quad (2)$$

121 with constants  $c_i^{(l)}$ . The time derivative of this function is

$$\dot{V}(S) = \sum_{l=1}^N \sum_i c_i^{(l)} \left( S_i^{(l)} - Q_i^{(l)} \right) w_i^{(l)}. \quad (3)$$

122 Inserting  $w_i^{(l)}$  from Eq. 1 into Eq. 3 one obtains sums of fluctuations of species concentrations. When demanding that  $\dot{V}(S)$  be  
 123 strictly negative, conditions result which relate the consumption efficiencies to the constants  $c_i^{(l)}$ . For  $l > 1$  and  $l=1$  the respective  
 124 conditions are [26]

$$\frac{c_i^{(l-1)}}{c_k^{(l)}} = \beta_{ki}^{l,l-1} \quad \text{and} \quad c_i^{(1)} = \frac{1}{k_i^{(1)}}. \quad (4)$$

125 Such  $c$ 's can always be found if each species is only connected to the basal level by one path, as any  $c$  parameter then can be

126 chosen as a simple product of the  $\beta$ 's present along the path to the basal level. In the more general case where some consumers  
127 feed on two prey species, the constraint will typically be violated, and if the product of  $\beta$ 's along different paths differs by a large  
128 factor the food-web might become unstable. In the case of omnivorous consumption such alternative weighted paths may even  
129 cause chaos [31].

130 Notably, Eq. 4 constrains  $\beta_{ki}^{(l,l-1)}$  and  $k_i^{(1)}$ , but is independent of the interaction strengths  $\eta_{kl}^{(l,l-1)}$  and decay rates  $\alpha_i^{(l)}$ .  
131 Stability is hence unaffected by these parameters and they can therefore be adjusted independently to achieve feasibility. As a  
132 noteworthy side remark, when defining the total and relative steady-state biomass,  $Q_{tot} \equiv \sum_i Q_i$ , respectively  $q_i \equiv Q_i/Q_{tot}$ ,  
133 one can express the steady state value of the Lyapunov function as  $V(Q) = Q_{tot} [1 + \ln D - \ln Q_{tot}]$ . Remarkably, this function  
134 only depend on  $Q_{tot}$  and the diversity  $D \equiv \exp(-\sum_i q_i \ln q_i)$ .

135 When the assembly rules [26] are fulfilled, a non-overlapping pairing of species can always be found. When only the links  
136 involved in pairs are considered, and the resource species of each pair is connected to another species/nutrient at the trophic level  
137 below, the resulting graph is a tree. In such a tree, or equivalently a hierarchical food web, each species can consume only one  
138 other species, or the nutrient source. These tree-like webs are particularly convenient, and minimal in the sense that each species  
139 contributes only one link. They constitute an extreme case of trophically coherent networks, as all species trivially have a unique  
140 trophic level.

141 The tree-structure generalizes the recently noted two-branch-structure [32], where rules for the three cases of even-even, odd-  
142 even, and odd-odd branches were described. As indicated above, the relation between  $c_i^{(l-1)}$  and  $\beta_{ki}^{(l,l-1)}$  can always be fulfilled  
143 by appropriate choices of  $c_i^{(l-1)}$  in a tree-like food web, without even making any assumptions on  $\beta_{ki}^{(l,l-1)}$ . Thus stability can be  
144 obtained, irrespective of the choice of any of the parameters for the link strengths or decay coefficients.

145 **Conditions for feasibility** —Although dynamical stability for tree-like food webs can always be achieved, it gives no answer to  
146 the existence of feasible steady state densities  $Q_i > 0$ . To prove that feasibility can be obtained, we consider the steady state of  
147 tree-like food webs and for simplicity specialize to  $\eta_i^{(l,l-1)} \equiv \eta$ ,  $\beta_i^{(l,l-1)} \equiv \beta$ , and  $k_i^{(1)} \equiv k$ , for all links, i.e. we assume all  
148 species to have similar interaction and growth coefficients. The species specific decay coefficients  $\alpha_i^{(l)}$  are free parameters. We  
149 will show that even under these constraints, positive steady state solutions can always be obtained.

150 In steady state  $w^{(l)} = 0$  in Eq. 1 allows us to determine all populations in a tree-like food web uniquely. Dividing the  
151 equations 1 through by  $\eta$ , this interaction strength only appears in terms of the form  $k/\eta$  and  $\alpha_i^{(l)}/\eta$ . For simplicity we hence  
152 absorb  $\eta$  in these two symbols, i.e.  $k \rightarrow k/\eta$  and  $\alpha_i^{(l)} \rightarrow \alpha_i^{(l)}/\eta$ . The equations separate species into two types, also discussed  
153 in the method section:

- 154 • For the first type the species biomass concentrations are entirely determined by sums of decay rates higher up in the food  
155 chain. These are the *controlled* species characterized above (Fig. 1b).
- 156 • The second type are *free* species, which have concentrations that are also affected by species or nutrients lower in the food  
157 chain (Fig. 1b). In simple food chains, such species are sometimes called *food limited* [32].

158 As mentioned above, a controlled species has exactly one free consumer. Further, both free and controlled species can have any  
159 number of controlled consumers.

160 Using Eq. 1 we find the steady state biomass concentrations of a free species at a trophic level  $l \geq 2$

$$Q_f^{(l+1)} = \beta Q^{(l-1)} - \alpha_{eff}^{(l)}, \quad (5)$$

161 where unnecessary subscripts were dropped for simplicity. Equation 5 expresses the biomass concentration of a free species in  
 162 terms of resources available to its prey (thus at level  $l - 1$ ) minus resources that are consumed because its prey is exposed to  
 163 various other sources of death. This include both spontaneous death, as well as possible predation by other consumers, described  
 164 through the effective decay rate

$$\alpha_{eff}^{(l)} \equiv \alpha^{(l)} + \sum_c Q_c^{(l+1)}. \quad (6)$$

165 The quantity  $\alpha_{eff}^{(l)}$  thus include intrinsic decay plus decay caused by all its consumers that are controlled from above, see Fig. 1c.  
 166 Thus controlled consumers contribute to the effective decay rate of their resources, whereas species without controlled consumers  
 167 only are exposed to their own limitations. Notice that we persistently use the subscripts  $f$  and  $c$  to denote free and controlled  
 168 consumers of the corresponding species, whereas absence of subscript implies that this species may be of either of the two types.

169 Let us for example consider the simple case where  $S^{(l)}$  is the biomass concentration of a top consumer that preys on a  
 170 resource  $S^{(l-1)}$ . In that case  $Q_f^{(l+1)} = 0$  and Eq. 5 simplifies to  $Q^{(l-1)} = \alpha_{eff}^{(l)}/\beta$ . Thus, the biomass  $Q^{(l-1)}$  is proportional to  
 171 the decay rate of its single free consumer including the loss to whatever that eats this consumer (Eq. 6). Because each species  
 172 can act as a resource for at most one free consumer (competitive exclusion), these other predators must all be controlled from  
 173 above.

174 Equations 5 and 6 allow us to determine all steady-state populations in a tree-like food web. When  $Q^{(l-1)}$  is free, an iterative  
 175 loop unfolds by Eq. 5, until a species with known density or controlled density is reached somewhere at a lower point in the  
 176 food-web. In some cases, this may demand continuation of the iterative loop (Eq. 5) until the basal level ( $l = 1$ ) is reached.  
 177 Closure of the system using the nutrient source similarly involves the interplay between free and controlled species at the basal  
 178 level.

179 As for the species, the nutrient source may be either free or controlled. For free nutrients (Fig. 2a), all basal species are  
 180 controlled and their densities  $Q_i^{(1)}$  are the (known) effective decay coefficients  $\alpha_{eff,i,f}^{(2)}$  of their respective free consumers  $Q_{i,f}^{(2)}$ .  
 181 The steady-state equation for basal species (Eq. 1) for each  $Q_i^{(1)}$  gives the population densities of the free consumers of  $Q_i^{(1)}$ :

$$Q_{i,f}^{(2)} = k \left( 1 - \frac{\alpha_{eff,i,f}^{(2)}}{\beta} \right) - \alpha_{eff,i}^{(1)}. \quad (7)$$

182 where  $\alpha_{eff,f}^{(2)} \equiv \sum_j \alpha_{eff,j,f}^{(2)}$  is the sum of all effective decay rates of the controlling (free) consumers at level two.

183 For controlled nutrients (Fig. 2b), one basal species is a free consumer of nutrients. Its population density equals:

$$Q_f^{(1)} = 1 - \sum_c Q_c^{(1)} - \alpha_{eff,f}^{(1)}/k \quad (8)$$

$$= 1 - \alpha_{eff,f}^{(2)}/\beta - \alpha_{eff,f}^{(1)}/k. \quad (9)$$

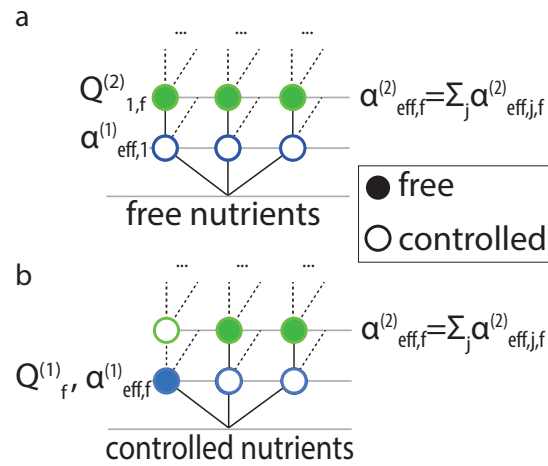

**Figure 2: Closure at the basal level.** **a**, Case of free nutrients: All basal species are controlled. **b**, Case of controlled nutrients: One basal species (density  $Q_f^{(1)}$ ) is free. Dashed lines in both panels symbolize links to possible controlled consumers.

184 Using either Eq. 7 or Eq. 9 in Eq. 5, the remaining free species densities can be determined.

185 When  $Q^{(l-1)}$  is controlled, Eq. 5 determines a species' population from its controlling consumers and their consumers further  
 186 up in the tree. At the same time,  $Q^{(l-1)}$  is determined by the effective decay rate of the corresponding free species  $\tilde{\alpha}_{eff,f}^{(l)}$  as  
 187  $Q^{(l-1)} = \tilde{\alpha}_{eff,f}^{(l)} / \beta$  (see Fig. 1d). Since this determines  $Q_f^{(l+1)}$  by Eq. 5, the constraint  $Q_f^{(l+1)} > 0$  amounts to

$$\tilde{\alpha}_{eff,f}^{(l)} > \alpha_{eff,f}^{(l)}. \quad (10)$$

188 The constraint in Eq. 10 specifies an inequality at each branching point of the tree-like food web. It amounts to saying that the  
 189 effective decay rate along the free branch has to be sufficiently high, in order to maintain the controlled branch. If the free branch  
 190 is more competitive than this limit dictates, then the controlled branch will at least partially collapse.

## 191 Construction of food webs

192 Given sustainability in terms of stability and feasibility we now systematically build up food webs. By this we mean that species  
 193 are attached one-by-one to an existing sustainable food web in a way that the resulting food web again is sustainable. When  
 194 composing food webs by sequential addition of species, we first note that for tree-like food webs, any added species will be a  
 195 free consumer. This means that it will be controlling its resource, and if also another species controls this resource, competitive  
 196 exclusion dictates that the one with the smallest effective decay rate will either eliminate the other or an odd number of consumers,  
 197 until the condition in Eq. 10 is again met. A successful invader will thus be free, and all other consumers of its resource must be  
 198 controlled. Further, the invader has to fulfill Eq. 10, implying that it must not be too efficient. This amounts to a lower bound  
 199 on an invading species' decay coefficient in order to maintain feasibility for existing species. An upper bound is given by the  
 200 requirement that also the new species should be feasible.

201 When inserting a new species at a small concentration, successful entry amounts to its decay coefficient being sufficiently



202 small. E.g. for an initial basal species this requirement is simply that  $\alpha^{(1)}/k < 1$ . Adding a second species at trophic level two,  
203 the condition that  $Q^{(2)}$  should be positive gives  $\alpha^{(2)}/\beta - \alpha^{(1)}/k < 1$ , a criterion that is easier to meet for large consumption  
204 efficiency  $\beta$ . To exemplify assembly of a sizable food web, we coarse-grain decay coefficients into steps of  $1 \gg \alpha_{min} = 0.02$ .  
205 Requiring this value also as a lower bound, Eq. 10 implies a sometimes substantial  $\alpha$ , especially for those species that are added  
206 to larger food-webs.

207 Our assembly starts with one basal species, and proceeds by iteratively making random additions of species as consumers to  
208 any existing species. An addition is only accepted whenever the assembly rules allow coexistence of both the invader and the  
209 previous species. Thus our assembly is not an attempt to mimic evolution, but rather an idealized procedure to construct stable  
210 and feasible food webs.

211 Note that in tree-like food webs, the trophic level of any particular species is determined by its single resource. We now set  
212  $k = 1$  in the remaining discussion as well as the simulations in Figs 3—4. The first species addition (Fig. 3a—c) yields a biomass  
213 density  $1 - \alpha_{min}$  and the added species is part of the first trophic level. As illustrated in Fig. 3a, subsequent additions can lead  
214 to rather large food webs. Panel b illustrates how the population sizes are distributed as the food web grows. One observes that  
215 for small systems populations are either small or large, whereas larger food webs have a single-peaked distribution of biomass  
216 (also quantified in Fig. 3e).

217 With every species addition, transitions of biomass occur, with invaders typically starting with relatively high biomass. The  
218 solid line in panel Fig. 3b illustrates that the addition of a species may cause drastic changes in populations of resident species.  
219 Note that this change is associated with a shift from acting as a controlled to acting as a free species. This can e.g. be seen in  
220 Fig. 3a, addition 5, where an added consumer reduces population densities in the food chain. Main branches could be seen as the  
221 main 'trophic pathway' [41], but upon any addition of a species, the main pathways can shift to another branch.

222 When following the build-up in Fig. 3a parallel branches with large biomass are possible (e.g. Fig. 3a, addition 6). Thereby  
223 the total biomass may substantially exceed that of a single initial species (Fig. 3c and Fig. 3d). The food webs obtained are  
224 however constrained by the overall decay compared with the total input from the basal level. Total species richness is also  
225 limited by the exact geometry of the food web. Food webs with many branching points often saturate earlier than those with  
226 predominantly parallel branches. Fig. 5 presents the average species richness of the largest food webs we obtained when no new  
227 additions were possible, i.e. when any addition would have violated the assembly rules or the sustainability conditions. We see  
228 that large  $\beta \approx 1$  and small minimal decay rates  $\alpha$  allow for food webs with species richness on the order of  $1/\alpha_{min}$ . Thus it is  
229 possible to reach realistic species richness ( $\approx 100$  in the webs compiled by Dunne et al. [33]).

230 To put the decay rate parameter  $\alpha$  into perspective it should be compared to the assumed maximal growth rate of 1. Therefore,  
231 for a species with a value  $\alpha = 0.02$  this corresponds to the ability of an individual to generate 50 descendants within its lifetime  
232 set by natural (non predatory) death of the individual. From Fig. 3 one also sees that the consumption efficiency  $\beta$  constrains  
233 maximally obtained species richness. However, even with low values of  $\beta$  a single nutrient source can support on the order of 10  
234 species. Thus, when considering that real ecosystems can have many different nutrient sources, we conclude that food webs of  
235 realistic size can exist under well mixed conditions.

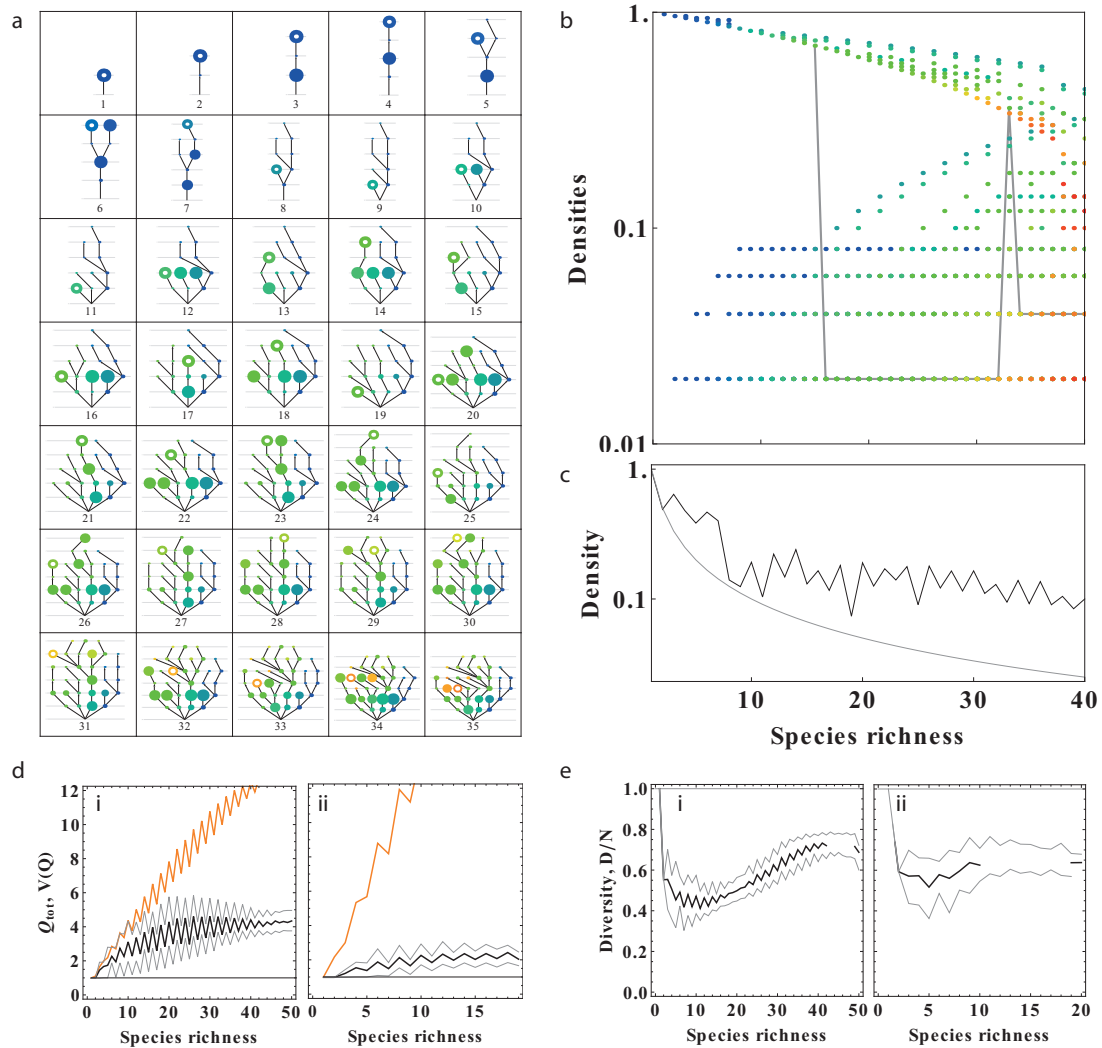

**Figure 3: Assembly of a sustainable model food web.** **a**, Sequential additions, starting from a single basal species. Colors from blue to orange indicate early and late additions, respectively. Area of nodes is proportional to steady-state species densities  $Q_i$ . Lines indicate consumer-resource links. Latest addition is marked by a white point in each panel. Number of addition marked below the webs. Note that after each addition, a new non-overlapping pairing (Fig. 1) can be found. **b**, Steady-state concentrations  $Q_i$  vs. species richness for the web in (a), in correspondingly chosen colors. Gray line: trajectory of a particular species, addition 15, compare (a). **c**, Average concentration  $\langle Q \rangle$ . Smooth line indicates the inverse of species richness. Note the logarithmic vertical axes in panels (b) and (c). **d**, Total biomass (black) and Lyapunov function (orange) averaged over multiple realizations of food webs as a function of species richness. Thin lines indicate the 10th and 90th biomass percentiles, respectively. **i**,  $\beta = 1$ , **ii**,  $\beta = 1/2$ . **e**, Diversity  $D \equiv \exp(-\sum_i q_i \ln q_i)$  per species for  $\beta = 1$  (i), respectively  $\beta = 1/2$  (ii).

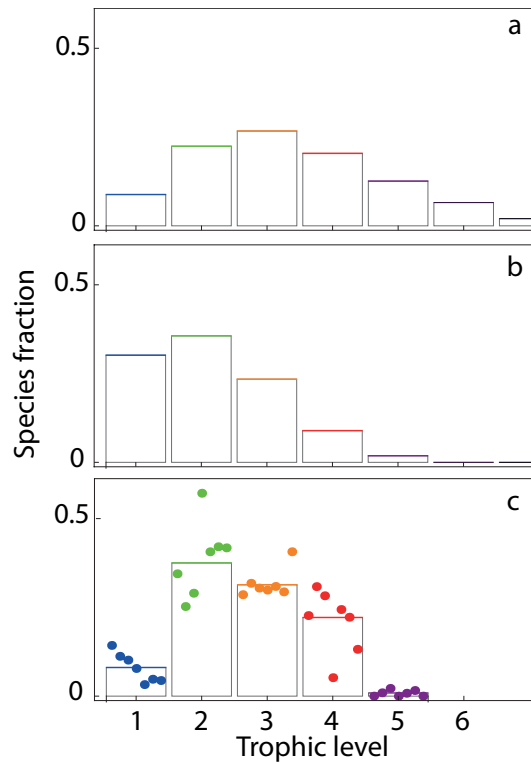

**Figure 4: Distribution of species richness according to trophic levels.** **a**, assembly prediction with  $\beta = 1$  and  $\alpha_{min} = 0.01$ . **b**, assembly prediction with  $\beta = 0.2$  and  $\alpha_{min} = 0.01$ . **c**, empirical data from 7 different food webs, compiled by Dunne et al. [33, 34]. The original data are: Carpinteria Salt Marsh, Estero de Punta Banda, Bahia Falsa[35, 36]; Flensburg Fjord [37], Sylt Tidal Basin [38]; Otago Harbor [39]; and Ythan Estuary [40]. The trophic level of a given species was determined as the average path length to the nutrient level when following predation links downwards towards the nutrient level.

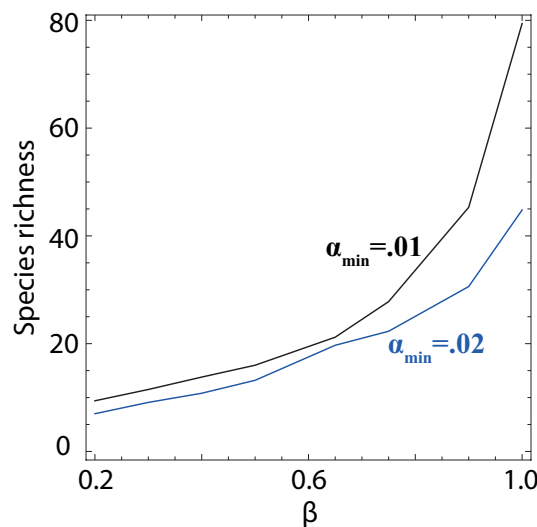

**Figure 5: Total species richness obtained in assembly of tree like food webs.** In our simulations, a single nutrient source was taken to provide the carrying capacity unity to trophic level one in the food web. Species richness depends on the minimal allowed spontaneous decay rate  $\alpha_{min}$ , two examples are shown for  $\alpha_{min} = .01$  and  $\alpha_{min} = .02$  (blue). The parameter  $\beta$  quantifies consumption efficiency, i.e. the proportion of consumed biomass that is available to the consumer in terms of population growth.

## 236 **Species richness in model and field data**

237 A generic feature of our networks is that species richness is largest at intermediate trophic levels, while there are few basal or top  
238 predator species [26]. This is commensurate with data, e.g. from terrestrial [42] and marine food webs [43]. It is also in line with  
239 results from a semi-analytical effective model [44], where the interaction matrix was parameterized to yield inequalities for the  
240 means and variances of species concentrations. Also there it was found that intermediate-level species richness should dominate.  
241 A value of  $\beta = 1$  thereby means perfect efficiency (Fig. 4a) whereas  $\beta = 0.2$  (Fig. 4b) means imperfect efficiency, i.e. most  
242 of the energy is lost at every consumption step and is thereby not available to the consumer. In both panels  $\alpha_{min} = 0.01$ , but  
243 results are very similar when using  $\alpha_{min} = 0.02$ . Fig. 4c shows the empirically measured distribution of species richness versus  
244 trophic levels for seven different food webs. We see that our assembly process produces quite reasonable distributions, in spite  
245 of the fact that our model so blatantly disregards both the evolutionary process of removal of species, omnivory, cooperation as  
246 well as spatial effects and non-linear responses.

## 247 **The effect of additional weak links**

248 Also, our model considers food webs with only a minimal number of strong links, implicitly assuming that most detected links  
249 are in fact weak. This assumption is certainly an idealization, however, we recall that empirical work suggests bi-modal link  
250 strength distributions, with few strong, but many weak links [16, 17, 18] — lending at least qualitative support to our assumption.  
251 To add realism, we augment our food webs by additional weak links between all species (example in Fig. 6). We find that as  
252 long as the strength of these additional links is kept below the value of  $\alpha_{min}$  feasibility is usually not threatened. In work on  
253 dynamical stability it was shown that for generalized Lotka-Volterra equations the equilibrium point and dynamical stability  
254 could be maintained by making simultaneous changes to the off-diagonal elements of the interaction matrix as well as the  
255 species growth rates and carrying capacities [14]. This shows that, once a feasible and stable steady state is obtained, nonzero  
256 off-diagonal terms could be “morphed”. Applying this to our weak links could allow these values to be further modified in a  
257 systematic way. Our results hence show that realistic food webs of arbitrary connectivity can, in principle, be sustainable.

## 258 **Discussion**

259 It is clear that large food webs are far from randomly connected. This is corroborated by both R. May’s seminal work as  
260 well as subsequent empirical and theoretical studies. Basic rules for possible sustainable structures of food webs have been  
261 constructed by building on either the competitive exclusion principle [26, 29, 45, 46] or by constraining the consumer-resource  
262 couplings by saturating [25, 47, 48] or saturated couplings [49]. Within the simple generalized Lotka-Volterra equations the  
263 present work shows that for any food web with invertible interaction matrix parameters exist where all species can have feasible  
264 and dynamically stable population densities. We further find that this can even be obtained under the further condition that  
265 all interaction strengths be equal and only decay rates vary. The present paper specifies how these rates can be chosen so that  
266 stability and feasibility of the food web are maintained at each step during its assembly.

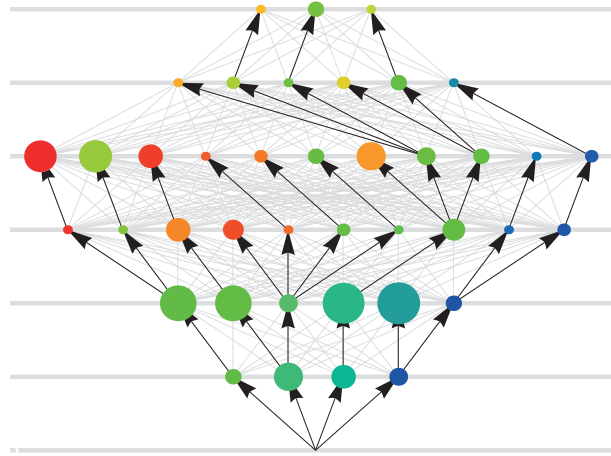

**Figure 6: Food web showing species population densities.** Species densities (circles) and feeding links (arrows). Circle areas are proportional to species densities. Colors from blue to red indicate earlier and later additions of species.

267 Using our procedure we easily obtained food webs with 5 trophic levels, and maximal species richness at levels 2 or 3. This  
268 distribution resembles the overall pattern found in real food webs with approximately 100 species (compiled by Dunne et al.  
269 [33]). Our analysis focused on one limiting nutrient source, whereas biodiversity in natural systems will likely be larger as the  
270 number of distinct sources is much greater than one. For our tree-like webs, separate or segregated resources would simply lead  
271 to an additive effect on species richness, with independent trees thriving separately, but would have no impact on the distributions  
272 of species richness we obtained. One implication is that large food webs in principle can have a total biomass that is substantially  
273 larger than the carrying capacity imposed on species at the basal level of the food chain.

274 Our study was constrained to the simplest, linear mass-action kinetics between consumer and resource, namely the type-I  
275 response. This simplification facilitated the clear division into *free* and *controlled* species. Our aim was to show that even within  
276 this constrained framework, where diversity is made more difficult, stable coexistence of many species at many trophic levels  
277 is possible. If one were to include type-II saturating response links, these inhibited interactions could prevent a consumer to  
278 completely control its resource which in turn can increase the parameter space for which many species could co-exist. It is thus  
279 remarkable that our species-richness distributions remain close to both the ones observed in the field and those assembled by  
280 using more complicated types of functional responses [50]. Notably, our present work further does not consider omnivory and  
281 parasitism, or self-interaction [51] and spatial dispersal [52, 53]. All these mechanisms can be alternative avenues to achieve  
282 coexistence, as can e.g. be seen by the current debate on the role of parasitism [26, 33, 36, 54, 55, 56].

283 Finally we emphasize that the current study focuses on monotonic assembly of food-webs, and thus entirely disregards the  
284 fact that invasion by new species will often force others to be eliminated. Such non-monotonic growth may bring about more  
285 fine-tuned selection of parameters for survivors, but will also render the long-term growth dynamics of the food web punctuated.  
286 At rare occasions, an invading fast growing basal species may even eliminate all species feeding on the same nutrients. Further  
287 studies of such evolutionary dynamics will be explored in future work.

## 288 **Acknowledgments**

289 The authors acknowledge financial support by the Danish National Research Foundation through the Center for Models of Life.  
290 This work was supported by a research grant (13168) from VILLUM FONDEN.

## 291 **Author Contributions**

All authors have jointly developed the research ideas, worked out the equations and written the manuscript.

## **References**

- [1] Robert M May. Will a large complex system be stable? *Nature*, 238:413–414, 1972.
- [2] T Frede Thingstad. Elements of a theory for the mechanisms controlling abundance, diversity, and biogeochemical role of lytic bacterial viruses in aquatic systems. *Limnology and Oceanography*, 45(6):1320–1328, 2000.
- [3] K. Moebus and H. Nattkemper. Bacteriophage sensitivity pattern among bacteria isolated from marine waters. *Helgol. Meeresunters.*, 34:375–385, 1981.
- [4] C. O. Flores, S. Valverde, and J. S. Weitz. Multi scale structure and geographic drivers of cross-infection within marine bacteria and phages. *The ISME journal*, pages 1–13, 2012.
- [5] Jan O Haerter, Namiko Mitarai, and Kim Sneppen. Phage and bacteria support mutual diversity in a narrowing staircase of coexistence. *The ISME journal*, 8:2317–2326, 2014.
- [6] Garrett Hardin. The competitive exclusion principle. *Science*, 131(3409):1292–1297, 1960.
- [7] David Tilman. Constraints and tradeoffs: toward a predictive theory of competition and succession. *Oikos*, pages 3–15, 1990.
- [8] Mark A McPeck. Trade-offs, food web structure, and the coexistence of habitat specialists and generalists. *American Naturalist*, pages S124–S138, 1996.
- [9] David Tilman. Diversification, biotic interchange, and the universal trade-off hypothesis. *The American Naturalist*, 178(3):355–371, 2011.
- [10] Peter Yodzis. The stability of real ecosystems. *Nature*, 289(5799):674–676, 1981.
- [11] Anje-Margriet Neutel, Johan AP Heesterbeek, and Peter C de Ruiter. Stability in real food webs: weak links in long loops. *Science*, 296(5570):1120–1123, 2002.
- [12] Sebastian J Plitzko, Barbara Drossel, and Christian Guill. Complexity–stability relations in generalized food-web models with realistic parameters. *Journal of theoretical biology*, 306:7–14, 2012.

- [13] Stefano Allesina and Jonathan M Levine. A competitive network theory of species diversity. *Proceedings of the National Academy of Sciences*, 108(14):5638–5642, 2011.
- [14] Stefano Allesina and Si Tang. Stability criteria for complex ecosystems. *Nature*, 483(7388):205–208, 2012.
- [15] Si Tang, Samraat Pawar, and Stefano Allesina. Correlation between interaction strengths drives stability in large ecological networks. *Ecology letters*, 17(9):1094–1100, 2014.
- [16] R. T. Paine. Food-web analysis through field measurement of per capita interaction strength. *Nature*, 355:73–75, 1992.
- [17] Peter C de Ruiter, Anje-Margriet Neutel, and John C Moore. Energetics, patterns of interaction strengths, and stability in real ecosystems. *Science*, (269):1257–60, 1995.
- [18] J Timothy Wootton and Mark Emmerson. Measurement of interaction strength in nature. *Annual Review of Ecology, Evolution, and Systematics*, pages 419–444, 2005.
- [19] GD Kokkoris, AY Troumbis, and JH Lawton. Patterns of species interaction strength in assembled theoretical competition communities. *Ecology Letters*, 2(2):70–74, 1999.
- [20] Kevin Shear McCann. The diversity–stability debate. *Nature*, 405(6783):228–233, 2000.
- [21] Samuel Johnson, Virginia Domínguez-García, Luca Donetti, and Miguel A Muñoz. Trophic coherence determines food-web stability. *Proceedings of the National Academy of Sciences*, 111(50):17923–17928, 2014.
- [22] SJ McNaughton. Stability and diversity of ecological communities. *Nature*, 274(5668):251–253, 1978.
- [23] Thilo Gross, Lars Rudolf, Simon A Levin, and Ulf Dieckmann. Generalized models reveal stabilizing factors in food webs. *Science*, 325(5941):747–750, 2009.
- [24] Josef Hofbauer and Karl Sigmund. *The Theory of Evolution and Dynamical Systems*. Cambridge University Press, pg 59ff, 1988.
- [25] Barbara Drossel and Alan J McKane. Modelling food webs. In S Bornholdt and Hans G Schuster, editors, *Handbook of Graphs and Networks*, pages 218–247. Wiley-VCH GmbH & Co., 2003.
- [26] Jan O Haerter, Namiko Mitarai, and Kim Sneppen. Food web assembly rules for generalized lotka-volterra equations. *PLoS Computational Biology*, page 10.1371/journal.pcbi.1004727, 2016.
- [27] László Lovász and Michael D Plummer. *Matching theory*. New York, 1986.
- [28] GF Gause. The struggle for existence. *Soil Science*, 41(2):159, 1936.
- [29] Richard Levins. Coexistence in a variable environment. *American Naturalist*, 114:765–783, 1979.
- [30] Bo S Goh. Global stability in many-species systems. *American Naturalist*, pages 135–143, 1977.

- [31] Kumi Tanabe and Toshiyuki Namba. Omnivory creates chaos in simple food web models. *Ecology*, 86(12):3411–3414, 2005.
- [32] Sabine Wollrab, Sebastian Diehl, and André M Roos. Simple rules describe bottom-up and top-down control in food webs with alternative energy pathways. *Ecology letters*, 15(9):935–946, 2012.
- [33] Jennifer A Dunne, Kevin D Lafferty, Andrew P Dobson, Ryan F Hechinger, Armand M Kuris, Neo D Martinez, John P McLaughlin, Kim N Mouritsen, Robert Poulin, Karsten Reise, et al. Parasites affect food web structure primarily through increased diversity and complexity. *PLoS biology*, 11(6):e1001579, 2013.
- [34] Jennifer A. Dunne et al. Data from: Parasites affect food web structure primarily through increased diversity and complexity. dryad digital repository. <http://dx.doi.org/10.5061/dryad.b8r5c>, 2013.
- [35] Ryan F Hechinger, Kevin D Lafferty, John P McLaughlin, Brian L Fredensborg, Todd C Huspeni, Julio Lorda, Parwant K Sandhu, Jenny C Shaw, Mark E Torchin, Kathleen L Whitney, et al. Food webs including parasites, biomass, body sizes, and life stages for three California/Baja California estuaries: Ecological archives e092-066. *Ecology*, 92(3):791–791, 2011.
- [36] Kevin D Lafferty, Andrew P Dobson, and Armand M Kuris. Parasites dominate food web links. *Proceedings of the National Academy of Sciences*, 103(30):11211–11216, 2006.
- [37] C Dieter Zander, Neri Josten, Kim C Detloff, Robert Poulin, John P McLaughlin, and David W Thieltges. Food web including metazoan parasites for a brackish shallow water ecosystem in Germany and Denmark: Ecological Archives E092-174. *Ecology*, 92(10):2007–2007, 2011.
- [38] David W Thieltges, Karsten Reise, Kim N Mouritsen, John P McLaughlin, and Robert Poulin. Food web including metazoan parasites for a tidal basin in Germany and Denmark: Ecological Archives E092-172. *Ecology*, 92(10):2005–2005, 2011.
- [39] Kim N Mouritsen, Robert Poulin, John P McLaughlin, and David W Thieltges. Food web including metazoan parasites for an intertidal ecosystem in New Zealand: Ecological Archives E092-173. *Ecology*, 92(10):2006–2006, 2011.
- [40] M Huxham, S Beaney, and D Raffaelli. Do parasites reduce the chances of triangulation in a real food web? *Oikos*, 76:284–300, 1996.
- [41] Yunne-Jai Shin, Morgane Travers, and Olivier Maury. Coupling low and high trophic levels models: Towards a pathways-orientated approach for end-to-end models. *Progress in Oceanography*, 84(1):105–112, 2010.
- [42] Neo D. Martinez. Artifacts or attributes? Effects of resolution on the Little Rock Lake food web. *Ecol. Monographs*, 61(4):367–392, 1991.
- [43] Jennifer A Dunne, Richard J Williams, and Neo D Martinez. Network structure and robustness of marine food webs. *Marine Ecology Progress Series*, 273:291–302, 2004.



- [44] Ugo Bastolla, Michael Lässig, Susanna C Manrubia, and Angelo Valleriani. Biodiversity in model ecosystems, II: species assembly and food web structure. *Journal of theoretical biology*, 235(4):531–539, 2005.
- [45] Robert MacArthur and Richard Levins. Competition, habitat selection, and character displacement in a patchy environment. *Proceedings of the National Academy of Sciences of the United States of America*, 51(6):1207, 1964.
- [46] Simon A Levin. Community equilibria and stability, and an extension of the competitive exclusion principle. *American Naturalist*, 104:413–423, 1970.
- [47] Barbara Drossel, Alan J McKane, and Christopher Quince. The impact of nonlinear functional responses on the long-term evolution of food web structure. *Journal of Theoretical Biology*, 229(4):539–548, 2004.
- [48] Barbara Drossel and Alan J McKane. Modelling food webs. *arXiv preprint nlin/0202034*, 2002.
- [49] Sanjay Jain and Sandeep Krishna. A model for the emergence of cooperation, interdependence, and structure in evolving networks. *Proceedings of the National Academy of Sciences*, 98(2):543–547, 2001.
- [50] Jose M Montoya and Ricard V Solé. Topological properties of food webs: From real data to community assembly models. *Oikos*, 102(3):614–622, 2003.
- [51] David Tilman. Competition and biodiversity in spatially structured habitats. *Ecology*, 75(1):2–16, 1994.
- [52] J. O. Haerter and K. Sneppen. Spatial structure and lamarckian adaptation explain extreme genetic diversity at crispr locus. *mBio*, 3:4, 2012.
- [53] John Harte. *Maximum entropy and ecology: a theory of abundance, distribution, and energetics*. Oxford University Press, 2011.
- [54] Peter J Hudson, Andrew P Dobson, and Kevin D Lafferty. Is a healthy ecosystem one that is rich in parasites? *Trends in Ecology & Evolution*, 21(7):381–385, 2006.
- [55] Kevin D Lafferty, Stefano Allesina, Matias Arim, Cherie J Briggs, Giulio De Leo, Andrew P Dobson, Jennifer A Dunne, Pieter TJ Johnson, Armand M Kuris, David J Marcogliese, et al. Parasites in food webs: the ultimate missing links. *Ecology letters*, 11(6):533–546, 2008.
- [56] Pieter TJ Johnson, Andrew Dobson, Kevin D Lafferty, David J Marcogliese, Jane Memmott, Sarah A Orlofske, Robert Poulin, and David W Thieltges. When parasites become prey: ecological and epidemiological significance of eating parasites. *Trends in Ecology & Evolution*, 25(6):362–371, 2010.
